# Supplementary material
Source: PubMed Central journal article supplement (PMC7245179)
Supplement: 10875_2020_789_MOESM1_ESM.pdf [file 10875_2020_789_MOESM1_ESM.pdf]

**Supplemental Table 1A: Disease characteristics**

| ID                                       | Age (y) | Gender | HLH type | HLH genetic dgn       | HLH therapy         | Progr on TX    | Emapalumab # of doses | Eculizumab # of doses | sC5b-9 ng/mL | rUPCR mg/mg | Complement genes#         | Organ injury at TMA diagnosis |      |     |     |     |     | HCT | Status |                   |
|------------------------------------------|---------|--------|----------|-----------------------|---------------------|----------------|-----------------------|-----------------------|--------------|-------------|---------------------------|-------------------------------|------|-----|-----|-----|-----|-----|--------|-------------------|
|                                          |         |        |          |                       |                     |                |                       |                       |              |             |                           | RRT                           | Vent | PH  | Ser | HTN | CNS |     |        | GI                |
| <b>SUBJECTS WITH DIAGNOSIS OF TMA</b>    |         |        |          |                       |                     |                |                       |                       |              |             |                           |                               |      |     |     |     |     |     |        |                   |
| 1                                        | 1.3     | M      | HLH      | none                  | E/Dex ATG           | Y              | -                     | -                     | ND           | 2.3         | Het-CFHR3/R1              | Y                             | Y    | N   | Y   | Y   | Y   | N   | Y      | alive             |
| 2                                        | 17      | F      | HLH      | none                  | E/Dex CSA           | Y              | -                     | 7                     | 1271         | 4.5         | Het-CFI                   | Y                             | Y    | Y   | Y   | Y   | Y   | Y   | N      | dead <sup>a</sup> |
| 3                                        | 0.9     | M      | HLH      | none                  | AraC, Mpr Abatacept | Y              | -                     | 3                     | 325          | 10.2        | None                      | N                             | Y    | N   | Y   | Y   | Y   | N   | N      | alive             |
| 4                                        | 0.6     | M      | HLH-EBV  | none                  | E/Dex Ritux         | Y              | -                     | -                     | 388          | 11.4        | Het-CFHR3/R1              | Y                             | Y    | N   | N   | Y   | Y   | Y   | N      | dead <sup>a</sup> |
| 5                                        | 3       | F      | HLH      | ND                    | E/Dex               | Y              | -                     | 3                     | 1890         | 8.5         | None                      | N                             | Y    | N   | N   | Y   | N   | N   | N      | dead              |
| 6                                        | 0.8     | F      | FHL2     | PRF1                  | E/Dex               | Y              | -                     | 3                     | 922          | 48.5        | None                      | Y                             | Y    | N   | N   | Y   | Y   | N   | N      | dead              |
| 7                                        | 2       | M      | HLH      | None <sup>&amp;</sup> | E/Dex               | Y              | 21                    | 2                     | 1700         | 12          | CFHR3, CFHR1 dup, Het-CFI | Y                             | Y    | Y   | N   | Y   | Y   | Y   | N      | alive             |
| 8                                        | 1.1     | F      | Griselli | RAB27A                | E/Dex               | Y              | 6                     | 6                     | 196          | 12.5        | ND                        | N                             | N    | N   | N   | Y   | N   | N   | Y      | alive             |
| 9                                        | 0.7     | F      | HLH      | none                  | E/Dex               | Y              | 29                    | 9                     | 480          | 11          | Het-CFHR3/R1 Het-CFB      | N                             | Y    | Y   | N   | Y   | N   | Y*  | Y      | alive             |
| 10                                       | 3       | F      | XLP2     | XIAP                  | E/Dex               | Y <sup>#</sup> | 15                    | -                     | ND           | 0.45        | Het-CFHR3/R1 Het-CFHR5    | N                             | N    | n/e | N   | Y   | N   | N   | [Y]    | alive             |
| 11                                       | 0.7     | M      | Griselli | RAB27A                | E/Dex               | Y              | 10                    | -                     | 262          | 0.9         | ND                        | N                             | N    | N   | N   | Y   | N   | N   | Y      | alive             |
| 12                                       | 4       | M      | FHL4     | STX11                 | E/Dex               | Y              | 11                    | 6                     | 680          | 6.5         | ND                        | N                             | Y    | N   | Y   | Y   | Y   | Y   | Y      | alive             |
| 13                                       | 23      | F      | HLH-EBV  | none                  | E/Dex Ritux         | Y              | 4                     | -                     | 1315         | 0.9         | ND                        | Y                             | Y    | Y   | Y   | Y   | Y   | N   | N      | dead              |
| 14                                       | 9       | F      | HLH-EBV  | none                  | E/Dex Ritux         | Y              | 3                     | -                     | 1737         | 11.8        | ND                        | Y                             | Y    | N   | Y   | Y   | Y   | Y*  | N      | dead              |
| 15                                       | 0.6     | F      | FHL5     | STXBP2                | E/Dex Alemtuz       | Y              | 12                    | 9                     | 450          | 8.04        | ND                        | N                             | Y    | N   | N   | Y   | Y   | Y   | Y      | alive             |
| 16                                       | 4       | M      | FHL5     | STXBP2                | E/Dex               | Y              | 13                    | 11                    | 358          | 13.9        | ND                        | N                             | N    | N   | N   | Y   | Y   | N   | Y      | alive             |
| <b>SUBJECTS WITHOUT DIAGNOSIS OF TMA</b> |         |        |          |                       |                     |                |                       |                       |              |             |                           |                               |      |     |     |     |     |     |        |                   |
| 17                                       | 1.1     | M      | HLH-EBV  | none                  | E/Dex Ritux         | Y <sup>C</sup> | 18                    | n/a                   | 162          | 0.5         | ND                        | N                             | N    | N   | N   | N   | Y   | N   | Y      | alive             |
| 18                                       | 2.5     | F      | FHL5     | STXBP2                | E/Dex               | Y <sup>#</sup> | 13                    | n/a                   | ND           | 0.45        | ND                        | N                             | Y    | Y   | Y   | N   | N   | N   | [Y]    | dead              |
| 19                                       | 3.8     | M      | FHL3     | UNC13D                | E/Dex CSA           | Y <sup>C</sup> | 34                    | n/a                   | 186          | 0.6         | ND                        | N                             | N    | N   | N   | N   | Y   | N   | Y      | alive             |
| 20                                       | 2.2     | F      | HLH      | none                  | E/pred anakinra     | Y <sup>C</sup> | 22                    | n/a                   | 160          | 1.12        | ND                        | N                             | Y    | N   | N   | N   | Y   | N   | Y      | alive             |
| 21                                       | 9       | M      | Griselli | RAB27A                | E/Dex CSA           | Y <sup>C</sup> | 2                     | n/a                   | ND           | 0.2         | ND                        | N                             | Y    | N   | N   | N   | Y   | N   | N      | dead              |
| 22                                       | 0.3     | F      | FHL5     | STXBP2                | E/Dex               | Y              | 13                    | n/a                   | 234          | 5.1         | ND                        | N                             | N    | N   | N   | N   | N   | N   | Y      | alive             |
| 23                                       | <0.1    | F      | FHL3     | UNC13D                | E/Dex               | Y              | 1                     | n/a                   | ND           | 0.3         | ND                        | N                             | Y    | N   | N   | N   | Y   | N   | N      | dead              |

HLH: clinically diagnosed hemophagocytic lymphohistiocytosis, FHL: familial hemophagocytic lymphohistiocytosis, HLH-EBV: HLH-associated with Epstein- Barr virus, XLP2, X-linked lymphoproliferative disease type 2, M; male, F; female, E; etoposide, Dex: dexamethasone, Ritux: rituximab, CSA: cyclosporine, AraC: cytarabine, : alemtuzumab, Pred: prednisolone, Progr on Tx: progressed on therapy, Y; yes, N; no, ND; not done/not tested; n/e not examined, n/a: not applicable, RRT: renal replacement therapy, Vent: respiratory support via mechanical ventilation, PH: pulmonary hypertension, Ser; serositis, HTN: severe hypertension (>2

antihypertensive medication or continues infusion), CNS: central nervous system symptoms, GI- lower intestinal bleeding, HCT: hematopoietic cell transplantation, [Y] – indicated history of prior HCT with subsequent HLH relapse, #relapsed post first HCT, °CNS progression on therapy (received additional IT methotrexate ), ° autopsies with the evidence on TMA in the kidney. & 1 heterozygous variant of uncertain significance in BLOC1S6 (c.330C>G(p.H110Q)). # Complement gene variant information is listed in Supplemental Table 1B.

### Supplemental Table 1B: Complement variants identified in tested subjects with TMA

| ID | GENE NAME<br>(w/ Reference Sequence) | VARIANT<br>(predicted effect)                   | INTERPRETATION                                                                                                                                                                                                                                                                                                                                      |
|----|--------------------------------------|-------------------------------------------------|-----------------------------------------------------------------------------------------------------------------------------------------------------------------------------------------------------------------------------------------------------------------------------------------------------------------------------------------------------|
| 1  | <i>CFHR3/CFHR1</i> <sup>#</sup>      | heterozygous deletion                           | Unknown if in heterozygous state confers any additional risk for aHUS. This variant in heterozygous state has been reported in hematopoietic stem cell transplant (HCT) recipients with transplant-associated thrombotic microangiopathy (TA-TMA) (Jodele et al, Blood. 2016 Feb 25;127(8):989-96; Jodele et al, Blood. 2013 Sep 19;122(12):2003-7) |
| 2  | <i>CFI</i>                           | c.1246A>C(p.I416L), heterozygous deletion       | A likely pathogenic variant in CFI that is predicted to increase the risk of developing aHUS                                                                                                                                                                                                                                                        |
| 4  | <i>CFHR3/CFHR1</i> <sup>#</sup>      | Heterozygous deletion                           | Unknown if in heterozygous state confers any additional risk for aHUS. This variant in heterozygous state has been reported in hematopoietic stem cell transplant (HCT) recipients with transplant-associated thrombotic microangiopathy (TA-TMA) (Jodele et al, Blood. 2016 Feb 25;127(8):989-96; Jodele et al, Blood. 2013 Sep 19;122(12):2003-7) |
| 7  | <i>CFHR3</i><br><i>CFHR1</i>         | Partial duplication<br>Partial duplication      | A partial gene duplication involving exons 1-3 of <i>CFHR3</i> gene and exons 3-6 of <i>CFHR1</i> gene, which is of uncertain clinical significance.                                                                                                                                                                                                |
|    | <i>CFI</i> (NM_000204.3)             | c.1217G>A(p.R406H), heterozygous deletion       | VUCS unable to predict, reported in association with macular degeneration                                                                                                                                                                                                                                                                           |
| 9  | <i>CFHR3</i>                         | Heterozygous deletion                           | The presence of this deletion neither confirms nor rules out the diagnosis of atypical hemolytic uremic syndrome (aHUS).                                                                                                                                                                                                                            |
|    | <i>CFB</i> (NM_001710.5)             | c.1697A>C(p.E566A), heterozygous deletion       | VUCS, unable to predict                                                                                                                                                                                                                                                                                                                             |
|    | <i>CFHR1</i> (NM_002113.2)           | c.310C>T(p.H104Y), heterozygous deletion        | VUCS, unable to predict                                                                                                                                                                                                                                                                                                                             |
| 10 | <i>CFHR3/CFHR1</i> <sup>#</sup>      | heterozygous deletion                           | Unknown if in heterozygous state confers any additional risk for aHUS. This variant in heterozygous state has been reported in hematopoietic stem cell transplant (HCT) recipients with transplant-associated thrombotic microangiopathy (TA-TMA) (Jodele et al, Blood. 2016 Feb 25;127(8):989-96; Jodele et al, Blood. 2013 Sep 19;122(12):2003-7) |
|    | <i>CFHR5</i>                         | c.486_487insAA(p.E163fs), heterozygous deletion | heterozygous for a frameshift mutation in <i>CFHR5</i> is associated with aHUS                                                                                                                                                                                                                                                                      |

Genes sequenced: *C3*, *CFB*, *CFH*, *CFHR1*, *CFHR3*, *CFHR5*, *CFI*, *DGKE*, *MCP*, *THBD*.

<sup>#</sup>*CFHR3/CFHR1* deletion analysis is performed by multiple ligation-dependent probe amplification (MLPA) analysis.

VUCS = Variant of Uncertain Clinical Significance.
